# Supplementary material for: Annotation of Siberian Larch (Larix sibirica Ledeb.) Nuclear Genome—One of the Most Cold-Resistant Tree Species in the Only Deciduous GENUS in Pinaceae
Source: MDPI journal article supplement (doi:10.3390/plants11152062), 2022-08-06
Supplement: s1 [file s1]

**Text S1.** Parameters for MAKER configuration.

```
genome=~/.conifer/larch-c-v2.fa
organism_type=eukaryotic
est=~/.test_makerMPI/Trinity.fasta #non-redundant set of assembled ESTs in fasta format (classic EST
analysis)
altest=UCPtaeda.fa,UCGgnemon.fa,UCPabies.fa,UCPlambertiana.fa,UCPmacrophyllus.fa,UCP
menziesii.fa #EST/cDNA sequence file in fasta format from an alternate organism
est_gff=~/.conifer/larch-cufflinks.gtf #EST evidence from an external gff3 file
protein=~/.uniprot_sprot.fasta #protein sequence file in fasta format
model_org=all #select a model organism for RepBase masking in RepeatMasker
rmlib=larch-rep2.fa #provide an organism specific repeat library in fasta format for RepeatMasker
softmask=1 #use soft-masking rather than hard-masking in BLAST (i.e. seg and dust filtering)
augustus_species=larch4 #Augustus gene prediction species model
```

**Table S1.** Summary of repeat content in Siberian larch genome assembly annotated using RepeatMasker and combined library, comprising the RepeatModeler-derived library classified with TEclass, RepBase, MIPS, CPRD and PIER v1.0 libraries.

| Superfamily                             | Length, bp        | Number         | % of genome length |
|-----------------------------------------|-------------------|----------------|--------------------|
| <b>Class I: LTR retrotransposon</b>     |                   |                |                    |
| Gypsy                                   | 192527487         | 878785         | 1.60               |
| Gypsy/PtTalladega                       | 1663158           | 3646           | 0.01               |
| Gypsy/IFG                               | 254098            | 990            | <0.01              |
| Gypsy/PtAppalachian                     | 208844            | 773            |                    |
| Gypsy/PtOuachita                        | 191626            | 1025           |                    |
| Gypsy/Gymny                             | 138565            | 476            |                    |
| Gypsy/PtBastrop                         | 94602             | 594            |                    |
| Gypsy/RLG                               | 62107             | 1004           |                    |
| Gypsy/PtOzark                           | 24665             | 234            |                    |
| Gypsy/ALISEI                            | 21741             | 209            |                    |
| Gypsy/PsAppalachian                     | 16203             | 108            |                    |
| Gypsy/PtAngelina                        | 497               | 4              |                    |
| <b>Total Gypsy</b>                      | <b>195203593</b>  | <b>887848</b>  | <b>1.63</b>        |
| Copia                                   | 125043599         | 627489         | 1.04               |
| Copia/PtConagree                        | 115681            | 731            | <0.01              |
| Copia/Silava Pta                        | 115133            | 581            |                    |
| Copia/PtPineywoods                      | 64007             | 401            |                    |
| Copia/PtCumberland                      | 32521             | 251            |                    |
| <b>Total Copia</b>                      | <b>125370941</b>  | <b>629453</b>  | <b>1.04</b>        |
| DIR                                     | 7936310           | 51295          | 0.07               |
| ERV                                     | 444525            | 7717           | <0.01              |
| BEL                                     | 418006            | 7389           |                    |
| DIRS                                    | 135235            | 2287           |                    |
| ATGP                                    | 22493             | 272            |                    |
| RNLTR                                   | 10324             | 197            |                    |
| RMER                                    | 6732              | 110            |                    |
| RIRE                                    | 6682              | 100            |                    |
| Unclassified LTR                        | 1703439143        | 6246018        | 14.19              |
| <b>Total LTR</b>                        | <b>2032993984</b> | <b>7832686</b> | <b>16.94</b>       |
| <b>Class I: Non-LTR retrotransposon</b> |                   |                |                    |
| LINE                                    | 1124723825        | 4237879        | 9.37               |
| LINE/I                                  | 265525048         | 1577725        | 2.21               |
| LINE/L1                                 | 21091550          | 94925          | 0.18               |
| <b>Total LINE</b>                       | <b>1411340423</b> | <b>5910529</b> | <b>11.76</b>       |
| Penelope                                | 15970080          | 79330          | 0.13               |
| Penelope/Poseidon                       | 39219             | 411            | <0.01              |
| <b>Total Penelope</b>                   | <b>16009299</b>   | <b>79741</b>   | <b>0.13</b>        |
| SINE                                    | 10566091          | 79177          | 0.09               |
| LOA                                     | 19191             | 275            | <0.01              |
| Jockey                                  | 15690             | 120            |                    |
| TRAS                                    | 14525             | 228            |                    |
| LIN# SM                                 | 10491             | 169            |                    |
| BovB                                    | 9128              | 155            |                    |

| Superfamily                     | Length, bp        | Number          | % of genome length |
|---------------------------------|-------------------|-----------------|--------------------|
| Outcast                         | 6887              | 121             |                    |
| Hero                            | 6599              | 122             |                    |
| Other non-LTR                   | 22649056          | 133018          | 0.19               |
| <b>Total non-LTR</b>            | <b>1460647380</b> | <b>6203655</b>  | <b>12.17</b>       |
| Other retrotransposons          | 390376007         | 1771180         | 3.25               |
| <b>Total Class I</b>            | <b>3884017371</b> | <b>15807521</b> | <b>32.36</b>       |
| <b>Class II: DNA transposon</b> |                   |                 |                    |
| TIR                             | 19582568          | 105413          | 0.16               |
| Helitron                        | 6739134           | 28439           | 0.06               |
| EnSpm                           | 2142128           | 28885           | 0.02               |
| MuDR                            | 587040            | 8191            | <0.01              |
| MuDR/Vandal                     | 29783             | 546             |                    |
| MuDR/Rehavkus                   | 15474             | 220             |                    |
| MuDR/Arnold                     | 13638             | 151             |                    |
| MuDR/ATMU                       | 8652              | 143             |                    |
| MuDR/OSMU                       | 6609              | 85              |                    |
| <b>Total MuDR</b>               | <b>661196</b>     | <b>9336</b>     | <b>&lt;0.01</b>    |
| Mariner                         | 462692            | 7270            | <0.01              |
| REP                             | 167449            | 1355            |                    |
| Maverick                        | 517499            | 5211            |                    |
| hAT                             | 1073811           | 15821           |                    |
| Mite                            | 32189             | 505             |                    |
| TcMar                           | 30674             | 446             |                    |
| Harbinger                       | 20160             | 316             |                    |
| Stowaway                        | 3957              | 72              |                    |
| PiggyBac                        | 1065              | 20              |                    |
| Tourist                         | 845               | 16              |                    |
| Unclassified                    | 539184594         | 2226370         | 4.49               |
| <b>Total Class II</b>           | <b>570619961</b>  | <b>2429475</b>  | <b>4.76</b>        |
| <b>Others</b>                   |                   |                 |                    |
| Unclassified                    | 262494312         | 1345055         | 2.19               |
| Simple repeats                  | 46499317          | 983566          | 0.39               |
| Host                            | 12847092          | 18499           | 0.11               |
| Low complexity                  | 11560642          | 211886          | 0.09               |
| Other                           | 1215941           | 76131           | 0.01               |
| tRNA                            | 299376            | 4982            | <0.01              |
| rRNA                            | 189617            | 1947            |                    |
| RNA                             | 1325              | 16              |                    |
| Caulimovirus                    | 401990            | 3767            | <0.01              |
| <b>Grand Total</b>              | <b>4790146944</b> | <b>20882845</b> | <b>39.91</b>       |

**Table S2.** Summary of repeat content in a portion of long nanopore reads annotated using RepeatMasker and combined library, comprising the RepeatModeler-derived library classified with TEclass, RepBase, MIPS, CPRD and PIER v1.0 libraries.

| Class                   | Number          | Length, bp        | % of long read length |
|-------------------------|-----------------|-------------------|-----------------------|
| LTR                     | 6062560         | 2996181397        | 41.39                 |
| NonLTR                  | 3851106         | 1236818752        | 17.08                 |
| Unclassified Retro      | 2144145         | 640871730         | 8.85                  |
| DNA                     | 2220166         | 912053154         | 12.60                 |
| Unclassified Mobile DNA | 718063          | 244714706         | 3.38                  |
| Simple                  | 567070          | 29625299          | 0.41                  |
| Low complexity          | 90295           | 5201845           | 0.07                  |
| Host                    | 10475           | 2401744           | 0.03                  |
| RNA                     | 3801            | 597481            | 0.01                  |
| Caulimovirus            | 2615            | 227664            | 0.00                  |
| <b>Total</b>            | <b>15670296</b> | <b>6068693772</b> | <b>83.83</b>          |

**Table S3.** LTR repeat superfamilies in the loblolly pine BAC library found in the Siberian larch genome.

| Superfamily |               | Number of copies | Length, bp |
|-------------|---------------|------------------|------------|
| Gypsy       | PtTalladega   | 3646             | 1663158    |
|             | IFG           | 990              | 254098     |
|             | PtAppalachian | 773              | 208844     |
|             | PtOuachita    | 1025             | 191626     |
|             | Gymny         | 476              | 138565     |
|             | PtBastrop     | 594              | 94602      |
|             | PtOzark       | 234              | 24665      |
|             | PsAppalachian | 108              | 16203      |
|             | PtAngelina    | 4                | 497        |
| Copia       | PtConagree    | 731              | 115681     |
|             | Silava_Pta    | 581              | 115133     |
|             | PtPinewoods   | 401              | 64007      |
|             | PtCumberland  | 251              | 32521      |

**Table S4.** The number of transcripts containing the LRR domain among all transcripts, and the number of transcripts containing the ARC domain among transcripts shorter than 850 bp for transcriptomes of different Siberian larch tissues.

| Sample     | Total number of transcripts | Number of sequences containing LRR | Number of sequences containing LRR, % | Number of transcripts > 850 bp | Number of transcripts containing ARC domain |
|------------|-----------------------------|------------------------------------|---------------------------------------|--------------------------------|---------------------------------------------|
| Shoot      | 129,220                     | 1,846                              | 1.43                                  | 182                            | 56                                          |
| Seedling   | 55,584                      | 733                                | 1.32                                  | 14                             | 5                                           |
| Cambium    | 122,115                     | 1,599                              | 1.31                                  | 82                             | 18                                          |
| Autumn bud | 22,116                      | 194                                | 0.88                                  | 4                              | 2                                           |
| Needles    | 20,276                      | 110                                | 0.54                                  | -                              | -                                           |

**Table S5.** Assessment of gene space completeness using BUSCO.

| Species                                        | Complete, % | Partial, %  | Complete and partial, % | Mapped to genome, % |
|------------------------------------------------|-------------|-------------|-------------------------|---------------------|
| <i>Pinus taeda</i> genes*                      | 7.0         | 2.2         | 9.2                     | -                   |
| <i>Picea abies</i> genes                       | 22.5        | 13.1        | 35.6                    | -                   |
| <i>Picea glauca</i> genes                      | 17.2        | 9.1         | 26.3                    | -                   |
| <i>Larix sibirica</i> genes                    | <u>17.5</u> | <u>12.3</u> | <u>29.8</u>             | <u>-</u>            |
| <i>Picea abies</i> proteins**                  | 28.1        | 27.3        | 55.4                    | -                   |
| <i>Picea glauca</i> proteins                   | 21.1        | 11.5        | 32.6                    | -                   |
| <i>Pinus taeda</i> proteins                    | 41.7        | 19.4        | 61.1                    | -                   |
| <i>Pinus lambertiana</i> proteins              | 73.4        | 7.5         | 80.9                    | -                   |
| <i>Pseudotsuga menziesii</i> proteins          | 68.5        | 11.8        | 80.3                    | -                   |
| <i>Abies alba</i> proteins                     | 15.8        | 17.9        | 33.7                    | -                   |
| <i>Larix sibirica</i> proteins                 | 19.6        | 19.0        | 38.6                    | <u>-</u>            |
| <i>Picea abies</i> genome                      | 30.1        | 16.0        | 46.1                    | -                   |
| <i>Picea glauca</i> genome                     | 27.4        | 17.5        | 44.9                    | -                   |
| <i>Pinus taeda</i> genome                      | 28.6        | 14.5        | 43.1                    | -                   |
| <i>Larix sibirica</i> genome***                | <u>27.5</u> | <u>17.8</u> | <u>45.3</u>             | <u>-</u>            |
| <i>Larix sibirica</i> mRNA                     | 18.8        | 17.0        | 35.8                    | -                   |
| <i>Larix sibirica</i> transcriptome (bud)      | 24.4        | 19.9        | 44.3                    | 88.8                |
| <i>Larix sibirica</i> transcriptome (needle)   | 12.3        | 12.4        | 24.7                    | 85.0                |
| <i>Larix sibirica</i> transcriptome (cambium)  | 62.4        | 15.6        | 78.0                    | 77.9                |
| <i>Larix sibirica</i> transcriptome (shoot)    | 84.5        | 6.1         | 90.6                    | 88.7                |
| <i>Larix sibirica</i> transcriptome (seedling) | 45.0        | 20.6        | 65.6                    | 81.9                |

\* Using BUSCO genome mode and nucleotide sequences for annotated gene models

\*\* Using BUSCO protein mode and protein sequences for annotated gene models

\*\*\* Using BUSCO genome mode and whole genome assemblies

**Table S6.** Assessment of gene space completeness using BUSCO protein mode and protein sequences for annotated gene models.

| Species                      | Complete, % | Partial, % | Complete and partial, % |
|------------------------------|-------------|------------|-------------------------|
| <i>Pinus lambertiana</i>     | 73.4        | 7.5        | 80.9                    |
| <i>Pseudotsuga menziesii</i> | 68.5        | 11.8       | 80.3                    |
| <i>Pinus taeda</i>           | 41.7        | 19.4       | 61.1                    |
| <i>Picea abies</i>           | 28.1        | 27.3       | 55.4                    |
| <i>Larix sibirica</i>        | 19.6        | 19.0       | 38.6                    |
| <i>Abies alba</i>            | 15.8        | 17.9       | 33.7                    |
| <i>Picea glauca</i>          | 21.1        | 11.5       | 32.6                    |

**Table S7.** Summary of gene and genome assembly statistics among conifer and angiosperm plant species

| Parameter                                            | <i>Larix sibirica</i> (this study) | <i>Pinus taeda</i> (Wegrzyn et al., 2014) | <i>Picea abies</i> (Nystedt et al., 2013) | <i>Picea glauca</i> (Warren et al., 2015) | <i>Populus trichocarpa</i> (Tuskan et al. 2006)* |
|------------------------------------------------------|------------------------------------|-------------------------------------------|-------------------------------------------|-------------------------------------------|--------------------------------------------------|
| Estimated genome size, Gbp (Pellicer & Leitch, 2020) | 12.03                              | 20.15                                     | 19.57                                     | 15.79                                     | 0.48                                             |
| Assembly length**, Gbp                               | 5.59 / 12.34                       | 20.43 / 22.10                             | 9.99 / 12.30                              | 20.78 / 25.47                             | 0.42                                             |
| Assembly N50**, Kbp                                  | 3,098 / 6,443                      | 100,218 / 110,557                         | 7,747 / 5,206                             | 34,405 / 46,559                           | -                                                |
| Number of chromosomes                                | 12                                 | 12                                        | 12                                        | 12                                        | 19                                               |
| GC content (%)                                       | 35.41                              | 38.06                                     | 38.81                                     | 37.08                                     |                                                  |
| Repeat content (%)                                   | 65.98                              | 81.8                                      | 70.0***                                   | -                                         | 41                                               |
| Number of predicted gene models                      | 39,370                             | 50,172                                    | 70,968                                    | 102,915                                   | 41,377                                           |
| Number of full-length gene models                    | 24,551                             | -                                         | -                                         | -                                         | -                                                |
| Average CDS length, bp                               | 244.29                             | 419.81                                    | 287.21                                    | 283.56                                    | 233.05                                           |
| Average intron length, bp                            | 360.93                             | 1146.12                                   | 997.94                                    | 642.73                                    | 468.08                                           |
| Maximum intron length, bp                            | 10,153                             | 568 968                                   | 68 268                                    | 44 113                                    | 96 842                                           |

\* assembly at chromosome level

\*\* without gaps / with gaps.

\*\*\* inferred from unassembled reads (Nystedt et al., 2013)

**Table S8.** GO terms associated with cell wall metabolism and organization, programmed cell death (PCD), and hormone response that had a higher number of annotated genes in gymnosperms than in angiosperms.

| Category                   | GO.IDs     | GO.Names                                  |
|----------------------------|------------|-------------------------------------------|
| Cell wall and organization | GO:0009094 | L-phenylalanine biosynthetic process      |
|                            | GO:0009505 | plant-type cell wall                      |
|                            | GO:0009664 | plant-type cell wall organization         |
|                            | GO:0009698 | phenylpropanoid metabolic process         |
|                            | GO:0009699 | phenylpropanoid biosynthetic process      |
|                            | GO:0016998 | cell wall macromolecule catabolic process |
|                            | GO:0030245 | cellulose catabolic process               |
|                            | GO:0042546 | cell wall biogenesis                      |
|                            | GO:0046274 | lignin catabolic process                  |
|                            | GO:0047782 | coniferin beta-glucosidase activity       |
|                            | GO:0050269 | coniferyl-aldehyde dehydrogenase activity |
|                            | GO:0071555 | cell wall organization                    |
| PCD                        | GO:0006914 | autophagy                                 |
|                            | GO:0010506 | regulation of autophagy                   |
|                            | GO:0012501 | programmed cell death                     |
|                            | GO:0012502 | induction of programmed cell death        |
| Hormone response           | GO:0009695 | jasmonic acid biosynthetic process        |
|                            | GO:0009723 | response to ethylene                      |
|                            | GO:0009725 | response to hormone                       |
|                            | GO:0009738 | abscisic acid-activated signaling pathway |
|                            | GO:0009753 | response to jasmonic acid                 |
|                            | GO:0010427 | abscisic acid binding                     |
|                            | GO:0038199 | ethylene receptor activity                |
|                            | GO:0051740 | ethylene binding                          |

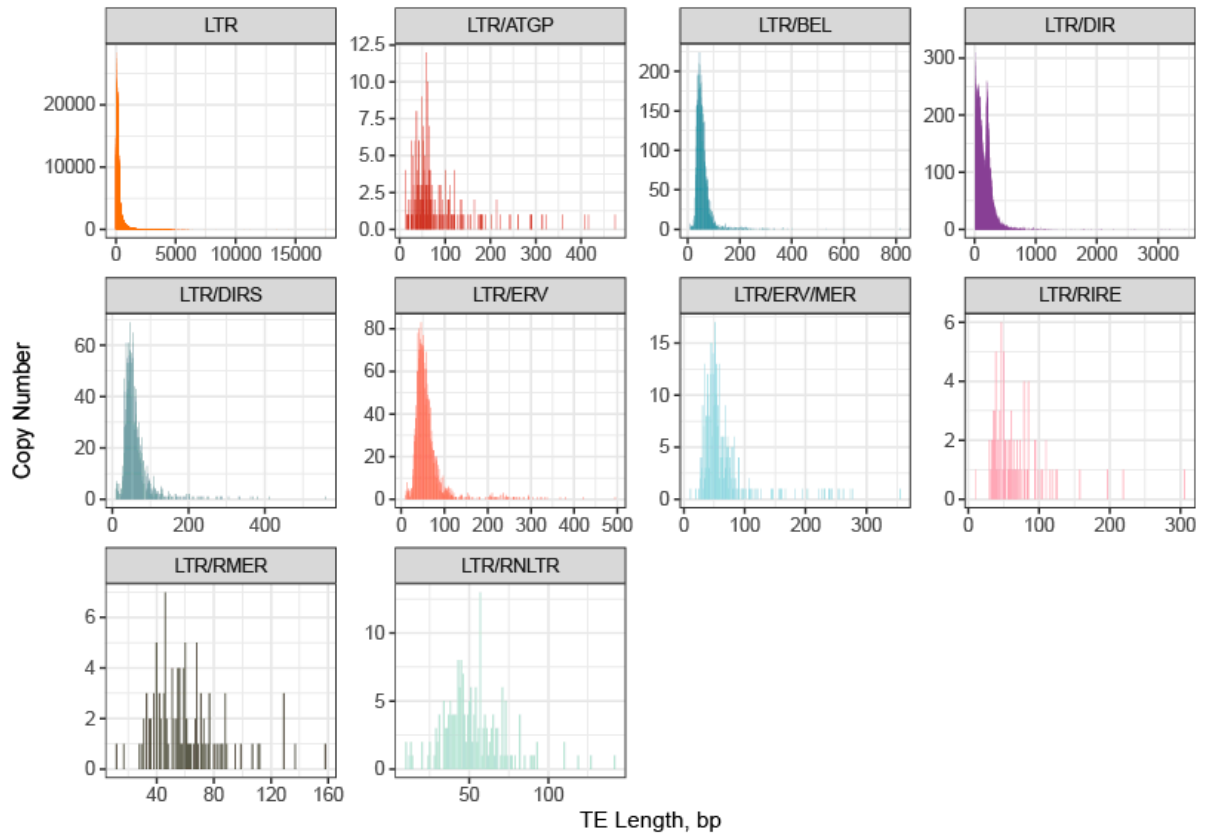

**Figure S1.** Length distribution of the main LTR-retrotransposons families in the Siberian larch genome.

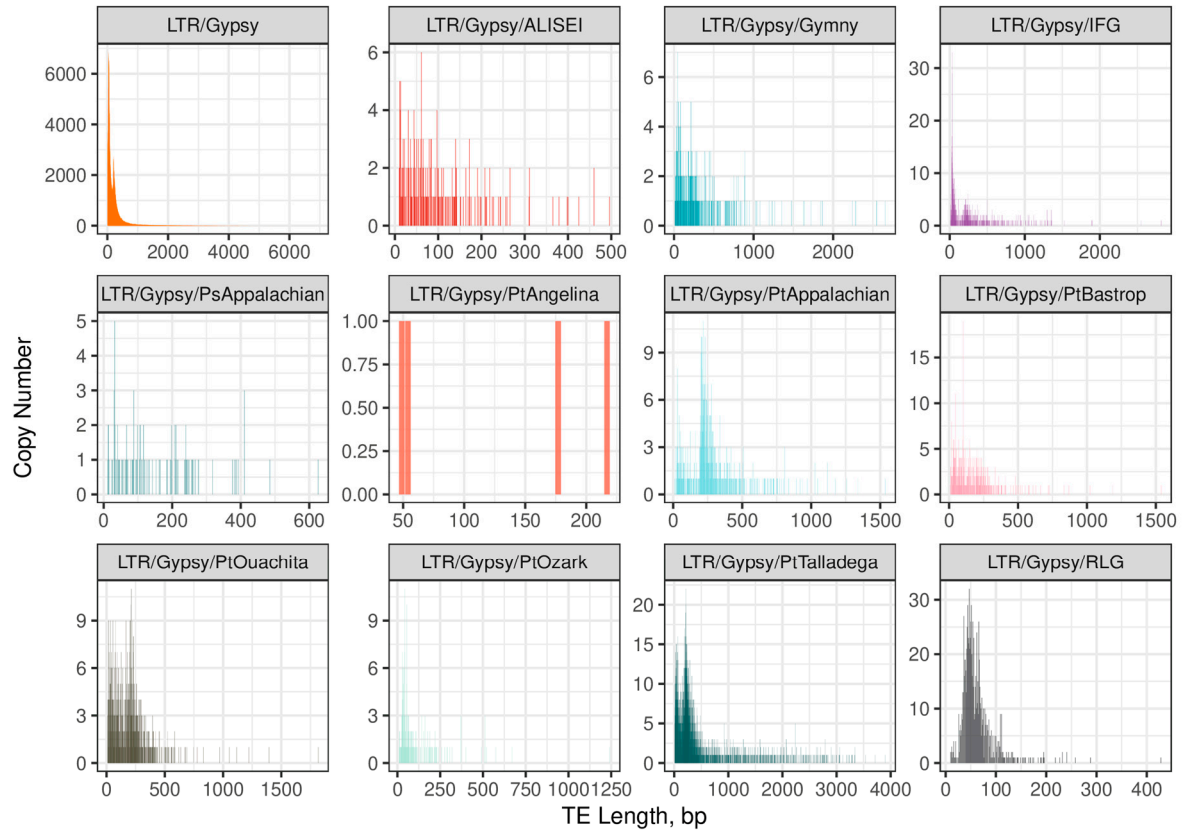

**Figure S2.** Length distribution of the Gypsy-retrotransposon superfamilies in the Siberian larch genome.



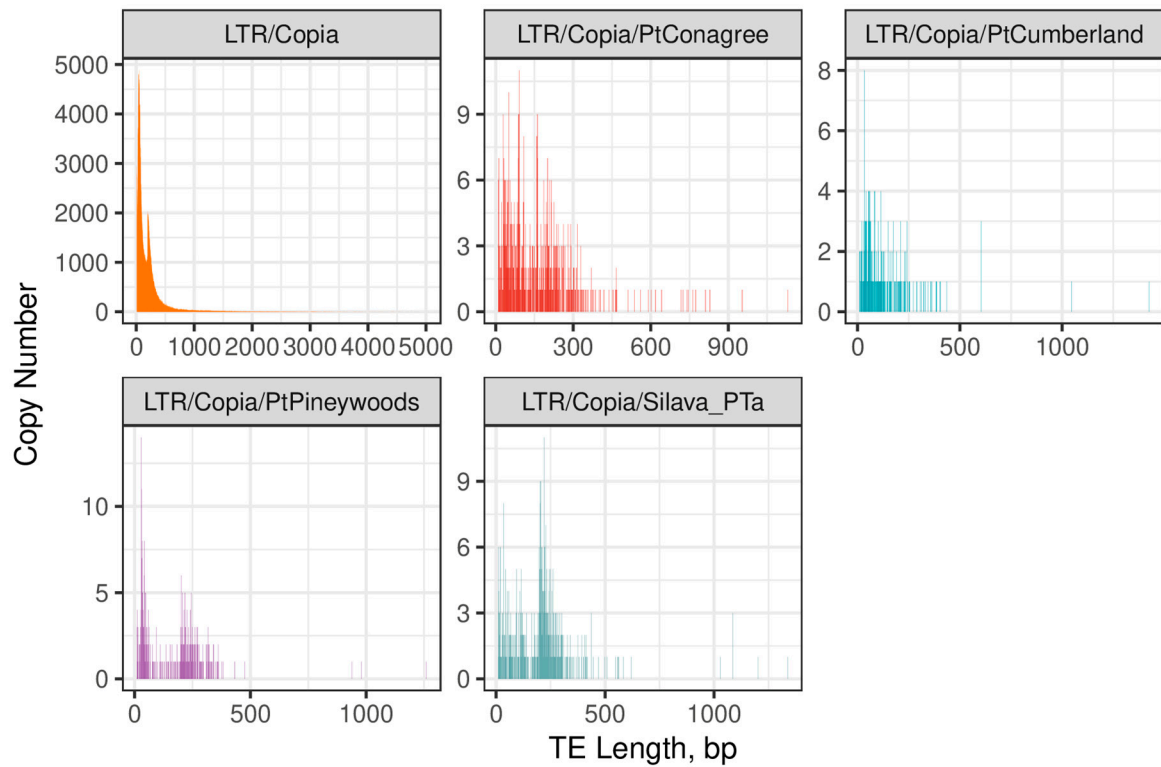

**Figure S3.** Length distribution of the Copia-retrotransposon superfamilies in the Siberian larch genome.

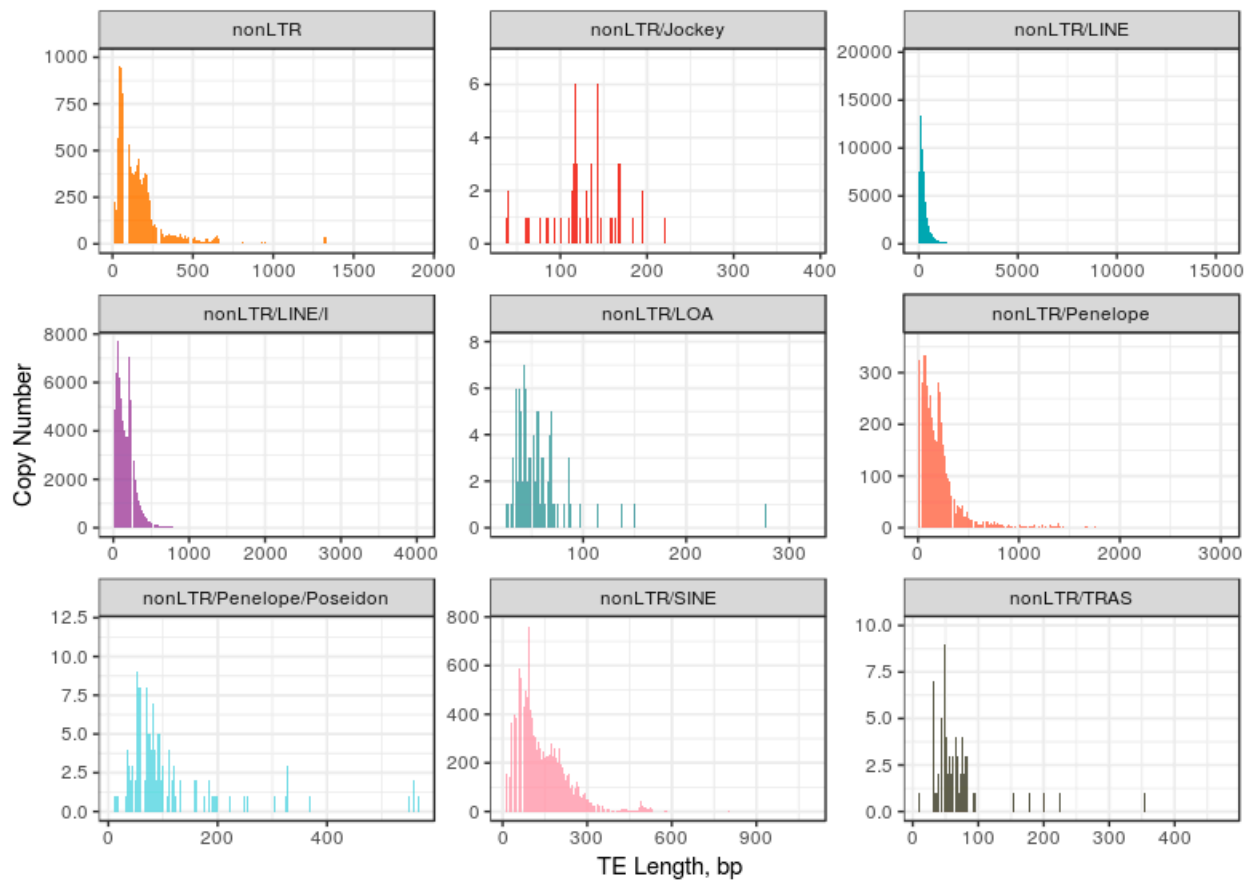

**Figure S4.** Length distribution of the main nonLTR-retrotransposon families in the Siberian larch genome.

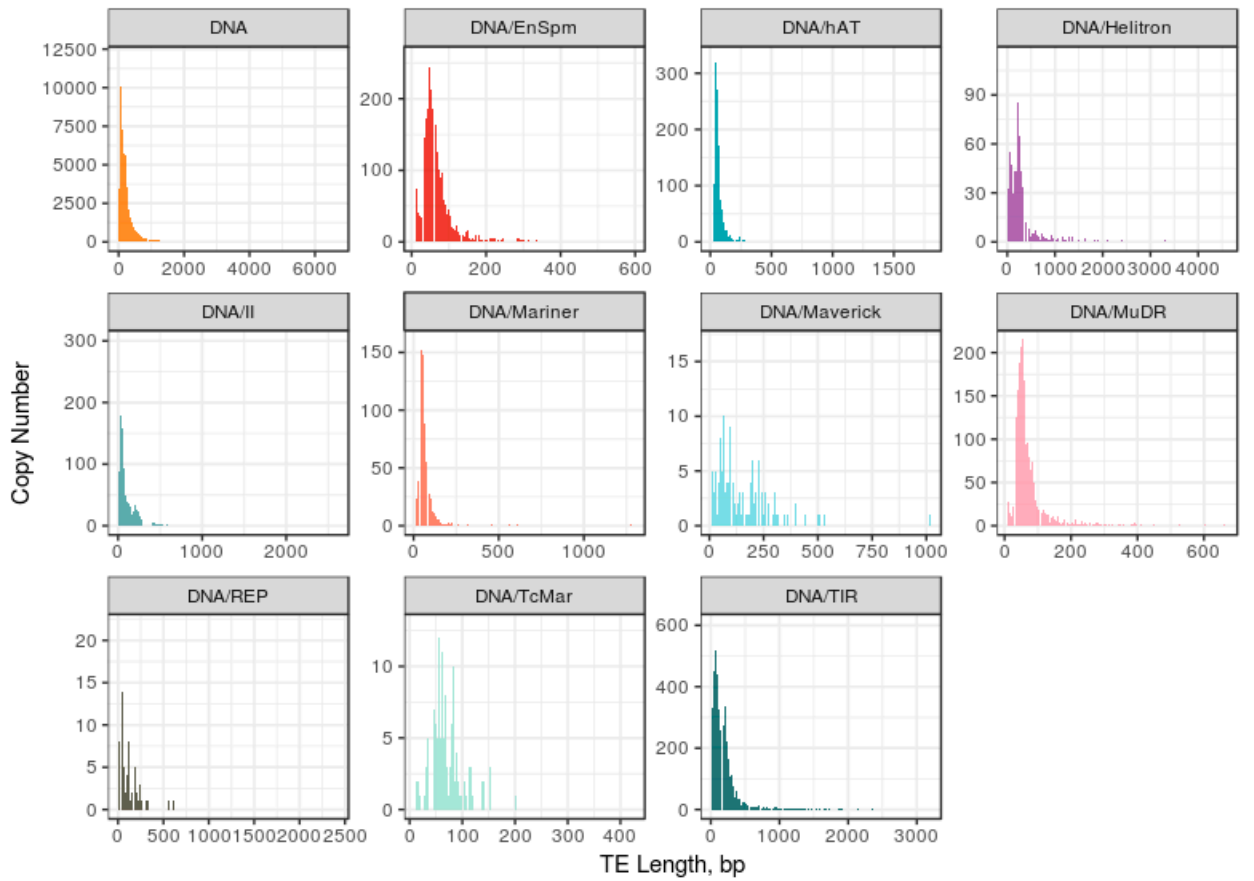

**Figure S5.** Length distribution of the main DNA-transposon families in the Siberian larch genome.

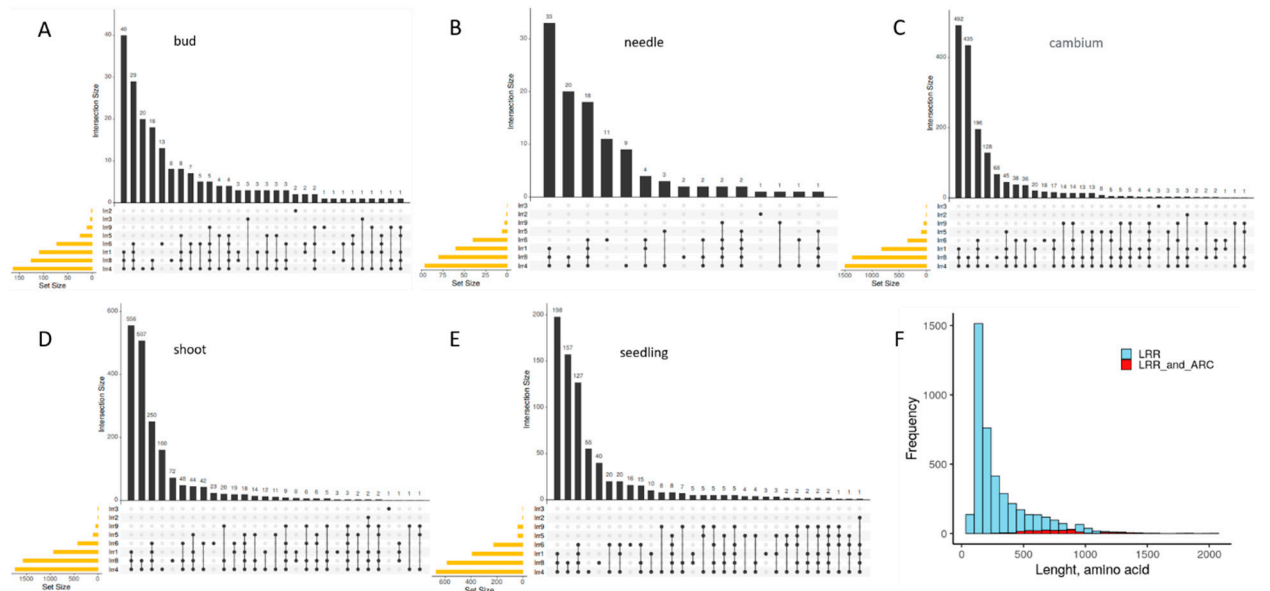

**Figure S6.** A-E - transcripts with LRRs found using nine LRR families (lrr1-lrr9) in the transcriptomes of five tissues (for example, 43 transcripts were found by each of the LRR-1, LRR-4 and LRR-8 families), F - the distribution of the lengths of the amino acids sequences of the putative R-genes, LRR — transcripts containing the LRR domain (in blue), LRR and ARC — transcripts containing the LRR and ARC domains (in red).

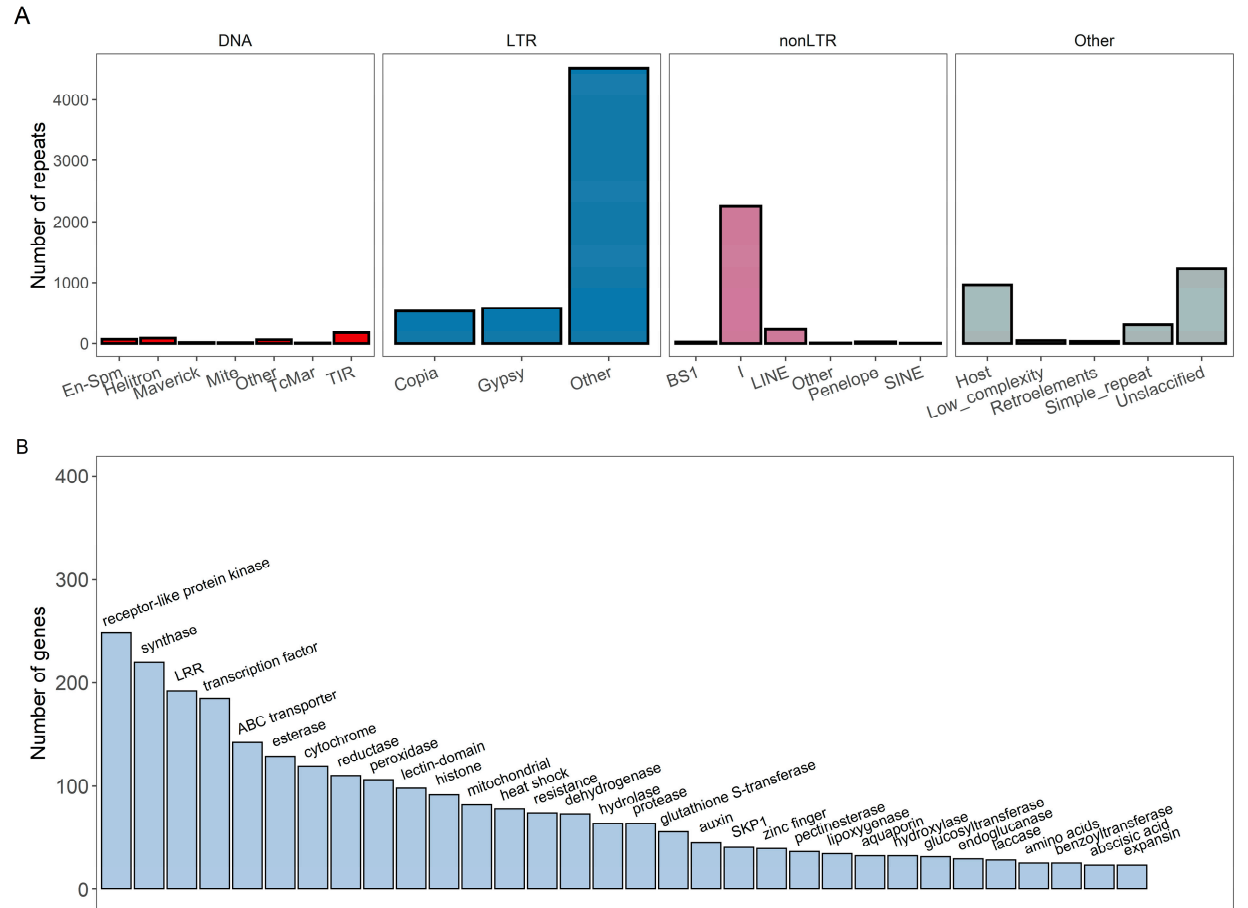

**Figure S7.** Repeats overlapping with predicted gene models. **A** - number of repeats overlapping with coding parts (CDS) with at least 20% overlap, **B** – the most frequent functional annotations of genes that overlap with repeats.

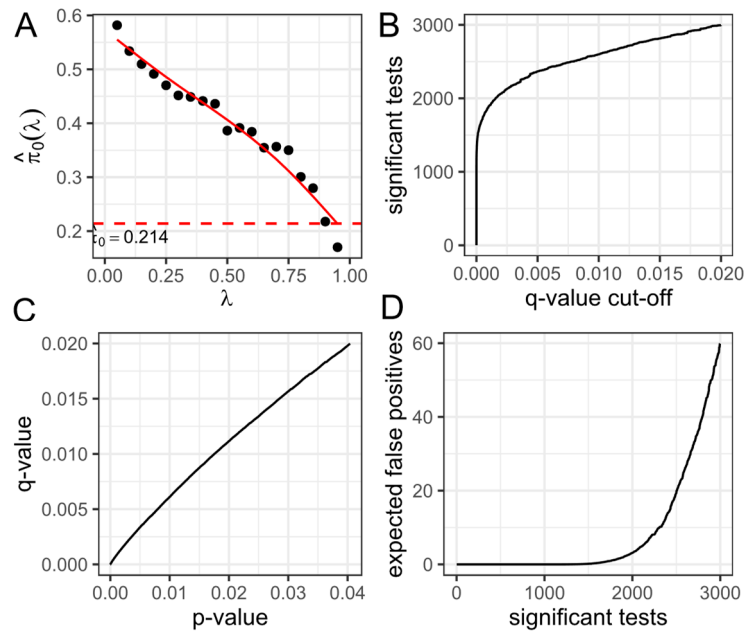

**Figure S8.** Storey's q-value estimates for FDR in GO comparison. **A** - the estimated proportion of true null hypotheses ( $\pi_0$ ) vs  $\lambda$ , **B** - the number of significant tests vs each q-value cutoff, **C** - the q-values vs the p-values, **D** - the number of expected false positives vs the number of significant tests.
